# Supplementary material for: Postoperative pain intensity and incidence following single visit root canal treatment with different obturation techniques: a randomized clinical trial
Source: PeerJ. 2022 Jul 27;10:e13756. doi: 10.7717/peerj.13756 (PMC9338753; doi:10.7717/peerj.13756)
Supplement: Supplemental Information 1 [file peerj-10-13756-s001.xlsx]

## Sheet: 06
		0	10	20	30	40	50	60	70	80	90	100
6	A	19	4	7	0	0	0	0	0	0	0	0	30
	B	27	2	0	1	0	0	0	0	0	0	0	30
	C	18	10	1	0	0	0	1	0	0	0	0	30
		0	10	20	30	40	50	60	70	80	90	100	550
	Lateral Compaction	0.633333	0.133333	0.233333	0	0	0	0	0	0	0	0	1
	Guttaflow 2	0.9	0.0666667	0	0.0333333	0	0	0	0	0	0	0	1
	Guttacore	0.6	0.333333	0.0333333	0	0	0	0.0333333	0	0	0	0	1

## Sheet: 012
		0	10	20	30	40	50	60	70	80	90	100
12	A	18	1	8	2	1	0	0	0	0	0	0
	B	26	1	1	0	1	0	0	0	1	0	0
	C	17	10	2	0	0	0	1	0	0	0	0
		0	10	20	30	40	50	60	70	80	90	100
	Lateral compaction	0.6	0.0333333	0.266667	0.0666667	0.0333333	0	0	0	0	0	0	1
	Guttaflow 2	0.866667	0.0333333	0.0333333	0	0.0333333	0	0	0	0.0333333	0	0	1
	Guttacore	0.566667	0.333333	0.0666667	0	0	0	0.0333333	0	0	0	0	1

## Sheet: 1
		0	10	20	30	40	50	60	70	80	90	100
1	A	25	4	0	1
	B	28	2
	C	19	7	2	1					1
		0	10	20	30	40	50	60	70	80	90	100
	Lateral compaction	0.833333	0.133333	0	0.0333333	0	0	0	0	0	0	0	1
	Guttaflow 2	0.933333	0.0666667	0	0	0	0	0	0	0	0	0	1
	Guttacore	0.633333	0.233333	0.0666667	0.0333333	0	0	0	0	0.0333333	0	0	1

## Sheet: 2
		0	10	20	30	40	50	60	70	80	90	100
2	A	27	3
	B	30	0	0
	C	21	6	1	1			1
		0	10	20	30	40	50	60	70	80	90	100
	Lateral compaction	0.9	0.1	0	0	0	0	0	0	0	0	0	1
	Guttaflow 2	1	0	0	0	0	0	0	0	0	0	0	1
	Guttacore	0.7	0.2	0.0333333	0.0333333	0	0	0.0333333	0	0	0	0	1

## Sheet: 3
		0	10	20	30	40	50	60	70	80	90	100
3	A	29	1
	B	30
	C	23	2	2	1			2
		0	10	20	30	40	50	60	70	80	90	100
	Lateral compaction	0.966667	0.0333333	0	0	0	0	0	0	0	0	0	1
	Guttaflow 2	1	0	0	0	0	0	0	0	0	0	0	1
	Guttacore	0.766667	0.0666667	0.0666667	0.0333333	0	0	0.0666667	0	0	0	0	1

## Sheet: 4
		0	10	20	30	40	50	60	70	80	90	100
4	A	29	1
	B	30
	C	25	2	2	1
		0	10	20	30	40	50	60	70	80	90	100
	Lateral Compaction	0.966667	0.0333333	0	0	0	0	0	0	0	0	0	1
	Guttaflow 2	1	0	0	0	0	0	0	0	0	0	0	1
	Guttacore	0.833333	0.0666667	0.0666667	0.0333333	0	0	0	0	0	0	0	1

## Sheet: 5
		0	10	20	30	40	50	60	70	80	90	100
5	A	29	1
	B	30
	C	27	1	1				1
		0	10	20	30	40	50	60	70	80	90	100
	Lateral compaction	0.966667	0.0333333	0	0	0	0	0	0	0	0	0	1
	Guttaflow 2	1	0	0	0	0	0	0	0	0	0	0	1
	Guttacore	0.9	0.0333333	0.0333333	0	0	0	0.0333333	0	0	0	0	1

## Sheet: 6
		0	10	20	30	40	50	60	70	80	90	100
6	A	30
	B	30
	C	28	1	1
		0	10	20	30	40	50	60	70	80	90	100
	Lateral compaction	1	0	0	0	0	0	0	0	0	0	0	1
	Guttaflow 2	1	0	0	0	0	0	0	0	0	0	0	1
	Guttacore	0.933333	0.0333333	0.0333333	0	0	0	0	0	0	0	0	1

## Sheet: 7
		0	10	20	30	40	50	60	70	80	90	100
7	A	30
	B	30
	C	29	1
		0	10	20	30	40	50	60	70	80	90	100
	Lateral compaction	1	0	0	0	0	0	0	0	0	0	0	1
	Guttaflow 2	1	0	0	0	0	0	0	0	0	0	0	1
	Guttacore	0.966667	0.0333333	0	0	0	0	0	0	0	0	0	1

## Sheet: vy
vy
		0.6	0.12	1	2	3	4	5	6	7
	A	11	12	5	3	1	1	1	0	0
	B	3	4	2	0	0	0	0	0	0
	C	12	13	12	9	7	5	3	2	1
	totally	26	29	19	12	8	6	4	2	1
		6h	12h	1 day	2 days	3 days	4 days	5 days	6 days	7 days
	Cold Lateral Condensation	0.366667	0.4	0.166667	0.1	0.0333333	0.0333333	0.0333333	0	0
	Guttaflow 2	0.1	0.133333	0.0666667	0	0	0	0	0	0
	Guttacore	0.4	0.433333	0.4	0.3	0.233333	0.166667	0.1	0.0666667	0.0333333
	Mean	0.288889	0.322222	0.211111	0.133333	0.0888889	0.0666667	0.0444444	0.0222222	0.0111111

[truncated: 3 more sheets: Diferences, Page , groups and time]
